# Supplementary material for: Diagnostic accuracy of alternative biomarkers for acute aortic syndrome: a systematic review
Source: Emerg Med J. 2024 Aug 6;41(11):e213772. doi: 10.1136/emermed-2023-213772 (PMC11503200; doi:10.1136/emermed-2023-213772)
Supplement: online supplemental file 3 [file emermed-41-11-s003.pdf]

**APPENDIX S3: Summary of the 38 excluded case-control studies**

| <b>Lead Author</b> | <b>Year of Publication</b> | <b>Country</b>              | <b>Cases</b>                  | <b>Controls</b>                                          | <b>Case Selection</b>                                      | <b>Control Selection</b>                                                                                              | <b>Biomarkers Evaluated</b>                                                    | <b>Reference Standard</b> |
|--------------------|----------------------------|-----------------------------|-------------------------------|----------------------------------------------------------|------------------------------------------------------------|-----------------------------------------------------------------------------------------------------------------------|--------------------------------------------------------------------------------|---------------------------|
| Cheng N(1)         | 2020                       | China                       | 20 AAD                        | 20 Unspecified Controls                                  | Patients diagnosed with AAD within set temporal boundaries | Unclear                                                                                                               | Proteomic Investigation for Novel Biomarkers                                   | Confirmed on Imaging      |
| Dong J(2)          | 2017                       | China                       | 63 (37 AD and 26 subacute AD) | 40 (23 CP with other diagnosis, 17 healthy controls)     | Patients diagnosed with AAD within set temporal boundaries | Patients diagnosed with alternative cause of CP within set temporal boundaries. Unclear how healthy controls selected | Micro-Ribonucleic Acids (MicroRNAs) and D-Dimer                                | Confirmed on Imaging      |
| Dong J(3)          | 2017                       | China                       | 202 AD patients               | 150 with other cardiovascular disease, 27 healthy people | Patients diagnosed with AAD within set temporal boundaries | Unclear                                                                                                               | D-Dimer and Fibrin Degradation Products (FDP)                                  | Confirmed on Imaging      |
| Eggebrecht H(4)    | 2004                       | Germany and The Netherlands | 16 AAD                        | 16 PE, 16 MI, 16 non-cardiac pain, 32 chronic stable AD  | Consecutive CP patients                                    | Consecutive CP patients with alternative diagnosis, unclear how patients with chronic stable AD were selected         | D-dimer, White Blood Cell Count (WBC), C-Reactive Protein (CRP) and fibrinogen | Confirmed on Imaging      |

|               |      |             |        |                                                                    |                                                                                                  |                                                                                                                                                       |                                                                                                                                                                                                              |                      |
|---------------|------|-------------|--------|--------------------------------------------------------------------|--------------------------------------------------------------------------------------------------|-------------------------------------------------------------------------------------------------------------------------------------------------------|--------------------------------------------------------------------------------------------------------------------------------------------------------------------------------------------------------------|----------------------|
| Forrer A(5)   | 2021 | Switzerland | 29 AAD | 121 (30 Non-Cardiac CP, 30 thoracic aortic aneurysm, 31 MI, 30 PE) | Consecutive patients diagnosed with AAD                                                          | Consecutive patients diagnosed with thoracic aortic aneurysm. MI patients selected from SPUM-ACS cohort. PE patients selected from SWITCO-65+ cohort. | Troponin, D-Dimer, Interleukin-10 (IL-10), Interleukin-6 (IL-6), Plasminogen Activator Inhibitor-1 (PAI1), Interleukin-1 receptor antagonist (IL-1ra), Insulin-Like Growth Factor Binding Protein-1 (IGFBP1) | Confirmed on Imaging |
| Hagiwara A(6) | 2013 | Japan       | 96     | 776 (187 MI, 142 Angina Pectoris, 353 CVA, 94 TIA)                 | Consecutive patients diagnosed with AAD                                                          | Consecutive patients during same period diagnosed with MI, Angina Pectoris, CVA and TIA                                                               | Fibrin Degradation Products and D-Dimer                                                                                                                                                                      | Confirmed on Imaging |
| Han C(7)      | 2021 | China       | 78     | 77 (Healthy)                                                       | Patients diagnosed with AAD within set temporal boundaries                                       | Healthy controls selected within the same temporal boundaries from outpatient physical examinations                                                   | S100A1, D-Dimer, High-Sensitivity C-Reactive Protein (hs-CRP), Troponin                                                                                                                                      | Confirmed on Imaging |
| Konig K(8)    | 2021 | Germany     | 33     | 43 (13 MI, 18 thoracic aneurysm, 12 healthy volunteers)            | Patients with AAD admitted for surgery non-consecutively selected within set temporal boundaries | Unclear                                                                                                                                               | Aggrecan, Creatine Kinase Myocardial Band (CKMB), Troponin                                                                                                                                                   | Unclear              |
| Li T(9)       | 2018 | China       | 88     | 88 (Healthy)                                                       | Patients diagnosed with AAD within set                                                           | Unclear                                                                                                                                               | Plasma Matrix Metalloproteinase 9 (MMP-9)                                                                                                                                                                    | Confirmed on Imaging |

|               |      |        |        |                                           |                                                                |                                                                                                          |                                                                      |                      |
|---------------|------|--------|--------|-------------------------------------------|----------------------------------------------------------------|----------------------------------------------------------------------------------------------------------|----------------------------------------------------------------------|----------------------|
|               |      |        |        |                                           | temporal boundaries                                            |                                                                                                          | and Toll-Like Receptor 4 (TLR-4)                                     |                      |
| Liu X(10)     | 2018 | China  | 43     | 43 healthy controls                       | Unclear                                                        | Case-matched healthy individuals with normal physical and echocardiographic findings                     | Plasma Resistin                                                      | Confirmed on Imaging |
| Ohle R(11)    | 2018 | Canada | 194    | 776 nonspecific CP                        | Patients diagnosed with AAD within set temporal boundaries     | Patients suspected of AAD but who received an alternative diagnosis in ED within set temporal boundaries | Creatinine, White Blood Cell Count and Liver Function Tests (LFTs)   | Confirmed on Imaging |
| Ohlmann P(12) | 2006 | France | 94     | 94 with AAD ruled out                     | Consecutive patients diagnosed with AAD                        | Case-matched patients with clinical suspicion for AAD but diagnosed otherwise                            | CRP, Troponin, Lactate Dehydrogenase (LDH), Leukocyte Count, D-Dimer | Confirmed on Imaging |
| Okazaki T(13) | 2014 | Japan  | 15     | 115 Acute CVA                             | Consecutive patients diagnosed with AAD                        | Consecutive patients diagnosed with CVA                                                                  | D-Dimer, Brain Natriuretic Peptide (BNP) and D-Dimer:BNP Ratio       | Confirmed on Imaging |
| Pan X(14)     | 2021 | China  | 86 AAD | 118 (60 MI, 28 PE, 30 Healthy Volunteers) | Consecutive patients presenting with CP and diagnosed with AAD | Consecutive CP patients with alternative diagnosis, unclear how healthy                                  | Lysophosphatidic Acid (LPA) and D-Dimer                              | Confirmed on Imaging |

|                 |      |        |         |                                                                                       |                                             |                                                                                                                   |                                                                                   |                      |
|-----------------|------|--------|---------|---------------------------------------------------------------------------------------|---------------------------------------------|-------------------------------------------------------------------------------------------------------------------|-----------------------------------------------------------------------------------|----------------------|
|                 |      |        |         |                                                                                       |                                             | volunteers were selected                                                                                          |                                                                                   |                      |
| Sbarouni E(15)  | 2007 | Greece | 18      | 29 (21 dilated ascending aortas scheduled for surgery and 8 normal controls)          | Consecutive AAD patients listed for surgery | Consecutive patients with chronic aortic aneurysm listed for surgery. Unclear how 8 normal subjects were selected | D-Dimer, White Blood Cell Count, C-Reactive Protein and Brain Natriuretic Protein | Confirmed on Imaging |
| Sbarouni E(16)  | 2018 | Greece | 120     | 242 (121 aortic aneurysm and 121 controls)                                            | Consecutive AAD patients listed for surgery | Consecutive patients with aortic aneurysm listed for elective surgery. Unclear how controls were selected         | Platelet to Lymphocyte Ratio, D-Dimer                                             | Confirmed on Imaging |
| Sbarouni E(17)  | 2015 | Greece | 120 AAD | 242 (121 Chronic Aneurysms and 121 healthy subjects)                                  | Consecutive AAD patients listed for surgery | Consecutive patients with aortic aneurysm listed for elective surgery. Unclear how controls were selected         | WBC Count, Neutrophil/Lymphocyte Ratio, D-Dimer and C-Reactive Protein            | Unknown              |
| Shinohara T(18) | 2003 | Japan  | 25      | 584 (50 AMI, 474 healthy controls, 20 other CP, 40 unmedicated hypertensive patients) | Unclear                                     | Unclear                                                                                                           | Soluble Elastin Fragments in Serum (s-ELAF)                                       | Confirmed on Imaging |

|             |      |        |              |                                   |                                                            |                                                                                                      |                                                                                                                                                       |                      |
|-------------|------|--------|--------------|-----------------------------------|------------------------------------------------------------|------------------------------------------------------------------------------------------------------|-------------------------------------------------------------------------------------------------------------------------------------------------------|----------------------|
| Xiao Z(19)  | 2016 | China  | 60           | 60 CP with other diagnoses        | Unclear                                                    | Unclear                                                                                              | Lumican, CRP, Thrombospondin-1 (TSP-1) and D-Dimer                                                                                                    | Confirmed on Imaging |
| Xu Z(20)    | 2017 | China  | 15 AAD + HTN | 15 Controls with HTN              | Unclear                                                    | Unclear                                                                                              | microRNAs                                                                                                                                             | Confirmed on Imaging |
| Yuan SM(21) | 2011 | China  | 20           | 29 (9 Aortic Aneurysm and 20 CAD) | Consecutive AAD patients listed for surgery                | Consecutive patients with aortic aneurysm listed for surgery. Unclear how CAD patients were selected | D-Dimer and hypersensitive CRP                                                                                                                        | Unclear              |
| Zeng Q(22)  | 2020 | China  | 19 AAD       | 20 Healthy Volunteers             | Unclear                                                    | Unclear                                                                                              | Fasting Blood Glucose, Triglyceride, Low-Density Lipoprotein (LDL), D-Dimer, CRP, IL-6, Trimethylamine N-Oxide (TMAO), Carnitine, Choline and Betaine | Confirmed on Imaging |
| Cakir A(23) | 2021 | Turkey | 20           | 20 Healthy Volunteers             | Unclear                                                    | Unclear                                                                                              | Signal Peptide-CUB-EGF Domain-containing Protein-1 (SCUBE-1)                                                                                          | Confirmed on Imaging |
| Jiang Y(24) | 2022 | China  | 20           | 10 healthy volunteers             | Unclear                                                    | Healthy controls gathered from the medical examination facility                                      | Oxylipin profile                                                                                                                                      | Confirmed on Imaging |
| Li T(25)    | 2022 | China  | 25           | 15 healthy volunteers             | Patients diagnosed with AAD within set temporal boundaries | Unclear                                                                                              | Genomescale leukocyte long noncoding RNAs (lncRNAs)                                                                                                   | Confirmed on Imaging |

|             |      |       |                                                 |                                                                                            |                                                                        |                                                                                                           |                                                                                                                                                                                                                                |                      |
|-------------|------|-------|-------------------------------------------------|--------------------------------------------------------------------------------------------|------------------------------------------------------------------------|-----------------------------------------------------------------------------------------------------------|--------------------------------------------------------------------------------------------------------------------------------------------------------------------------------------------------------------------------------|----------------------|
| Song R(26)  | 2022 | China | 57                                              | 57 acute coronary syndrome, 50 healthy volunteers                                          | Patients diagnosed with AAD within set temporal boundaries             | Unclear                                                                                                   | Fibrinogen degradation products (FDP), fibrinogen (Fib), prothrombin time (PT), activated partial thromboplastin time (APTT), tenascin C (TN-C), D-dimer (D-D), and N-terminal Btype natriuretic peptide precursor (NT-proBNP) | Confirmed on Imaging |
| Zheng Z(27) | 2012 | China | 118                                             | 94 chronic aneurism, 98 normal                                                             | Consecutive patients diagnosed with AAD within set temporal boundaries | Consecutive patients with aortic aneurysm listed for elective surgery. Unclear how controls were selected | D-dimer, CRP, BNP                                                                                                                                                                                                              | Unclear              |
| Xu Z(28)    | 2022 | China | 40 AAD                                          | 40 CP (17 STEMI, 11 unstable angina, 6 PE, 6 digestive tract disorder)                     | Patients diagnosed with AAD within set temporal boundaries             | Patients presenting with CP within set temporal boundaries                                                | D-Dimer, BNP and Troponin                                                                                                                                                                                                      | Confirmed on Imaging |
| Zhao G(29)  | 2020 | China | 22 AAD                                          | 287 (268 MI, 19 PE)                                                                        | Patients diagnosed with AAD within set temporal boundaries             | Patients diagnosed with MI or PE within set temporal boundaries                                           | D-Dimer                                                                                                                                                                                                                        | Confirmed on Imaging |
| Lu P(30)    | 2022 | China | 162 AD (Discovery Set); 105 AD (Validation Set) | 168 (135 CAD, 33 other cardiovascular disease) [Discovery Set]; 86 non-AD [Validation Set] | Patients diagnosed with AAD within set temporal boundaries             | Patients diagnosed with other cause of CP within set temporal boundaries                                  | FLUTHE (Serum Iron, LDL, Uric Acid, Transferrin, High-Density Lipoprotein (HDL) and estimated Glomerular Filtration Rate (eGFR))                                                                                               | Confirmed on Imaging |

|                   |      |         |        |                                                                                                        |                                                                                         |                                                                                                    |                                                                                                                     |                      |
|-------------------|------|---------|--------|--------------------------------------------------------------------------------------------------------|-----------------------------------------------------------------------------------------|----------------------------------------------------------------------------------------------------|---------------------------------------------------------------------------------------------------------------------|----------------------|
| Goliopoulou A(31) | 2022 | Greece  | 13 AAD | 49 (24 aortic root dilatation, 25 other cardiac surgery)                                               | Consecutive patients undergoing emergency surgical repair or Stanford Type A Dissection | Consecutive patients undergoing surgical repair of dilated aortic root or other cardiac surgery    | High-Sensitivity CRP, Matrix Metalloproteinase-2 (MMP 2), MMP 9, osteoprotegerin, adiponectin, mRNA 29 and mRNA 195 | Unclear              |
| Suzuki T(32)      | 1996 | Japan   | 27 AAD | 65 MI                                                                                                  | Patients admitted with AAD within set temporal boundaries                               | Unclear                                                                                            | Serum Smooth Muscle Myosin Heavy Chain                                                                              | Confirmed on Imaging |
| Hazui H(33)       | 2005 | Japan   | 29 AAD | 49 MI                                                                                                  | Consecutive patients diagnosed with AAD within set temporal boundaries                  | Consecutive patients diagnosed with MI within set temporal boundaries                              | D-Dimer, M-Ratio, Lactate Dehydrogenase, Myoglobin, Creatine Kinase, Haematocrit                                    | Confirmed on Imaging |
| Hagiwara A(34)    | 2010 | Japan   | 91 AAD | 783 (190 Acute Myocardial Infarction, 142 Angina, 357 Brain Infarction, 94 Transient Ischaemic Attack) | Consecutive patients diagnosed with AAD within set temporal boundaries                  | Patient admitted within the same time period and subsequently diagnosed with MI, Angina, BI or TIA | Plasma Fibrin and Fibrin Degradation Products                                                                       | Confirmed on Imaging |
| Suzuki T(35)      | 2011 | Japan   | 28 AAD | Unclear                                                                                                | Unclear                                                                                 | Unclear                                                                                            | Transforming Growth Factor Beta                                                                                     | Unclear              |
| Wagner A(36)      | 2002 | Austria | 18 AAD | 47 (27 free or covered aneurysm)                                                                       | Consecutive patients diagnosed with                                                     | Consecutive patients presenting to the                                                             | Plasma Endothelin                                                                                                   | Confirmed on Imaging |

|                |      |                |        |                                                                           |                                                                 |                                                                            |                                                                                                  |                      |
|----------------|------|----------------|--------|---------------------------------------------------------------------------|-----------------------------------------------------------------|----------------------------------------------------------------------------|--------------------------------------------------------------------------------------------------|----------------------|
|                |      |                |        | rupture, 20 aortic aneurysm without signs of acute dissection or rupture) | AAD within set temporal boundaries                              | emergency department with known chronic aneurysm                           |                                                                                                  |                      |
| Fletcher A(37) | 2021 | United Kingdom | 53 AAS | 106 Controls                                                              | Patients over 25 years old with confirmed AAS                   | Control subjects participating in the United Kingdom Aneurysm Growth Study | Plasma Desmosine                                                                                 | Confirmed on Imaging |
| Zhang D(38)    | 2023 | China          | 75 AAD | 86 Controls                                                               | Patients confirmed as having AAD (no clear temporal boundaries) | Unclear                                                                    | Exosomal miRNAs, Matrix Metalloproteinases 9 and 12, Transforming Growth Factor Beta and D-Dimer | Confirmed on Imaging |

AAD (Acute Aortic Dissection); AD (Aortic Dissection); AAS (Acute Aortic Syndrome); CP (Chest Pain); PE (Pulmonary Embolism); MI (Myocardial Infarction); SPUM-ACS (Special Programme University Medicine – Acute Coronary Syndrome); SWITCO-65+ (Swiss Venous Thromboembolism Cohort 65+); CVA (Cerebrovascular Accident); TIA (Transient Ischaemic Attack); HTN (Hypertension); STEMI (ST-Elevation Myocardial Infarction); BI (Brain Infarction)

## Appendix S3 References

1. Cheng N, Wang H, Zhang W, Wang H, Jin X, Ma X, et al. Comparative Proteomic Investigation of Plasma Reveals Novel Potential Biomarker Groups for Acute Aortic Dissection. *Disease markers*. 2020;2020:4785068.
2. Dong J, Bao J, Feng R, Zhao Z, Lu Q, Wang G, et al. Circulating microRNAs: a novel potential biomarker for diagnosing acute aortic dissection. *Scientific reports*. 2017;7(1):12784.
3. Dong J, Duan X, Feng R, Zhao Z, Feng X, Lu Q, et al. Diagnostic implication of fibrin degradation products and D-dimer in aortic dissection. *Scientific reports*. 2017;7:43957.
4. Eggebrecht H, Naber CK, Bruch C, Kroger K, von Birgelen C, Schmermund A, et al. Value of plasma fibrin D-dimers for detection of acute aortic dissection. *Journal of the American College of Cardiology*. 2004;44(4):804-9.
5. Forrer A, Schoenrath F, Torzewski M, Schmid J, Franke UFW, Gobel N, et al. Novel Blood Biomarkers for a Diagnostic Workup of Acute Aortic Dissection. *Diagnostics (Basel, Switzerland)*. 2021;11(4).
6. Hagiwara A, Shimbo T, Kimira A, Sasaki R, Kobayashi K, Sato T. Using fibrin degradation products level to facilitate diagnostic evaluation of potential acute aortic dissection. *Journal of thrombosis and thrombolysis*. 2013;35(1):15-22.
7. Han C, Liu Q, Li Y, Zang W, Zhou J. S100A1 as a potential biomarker for the diagnosis of patients with acute aortic dissection. *The Journal of international medical research*. 2021;49(4):3000605211004512.
8. Konig C, Lahm H, DreBen M, Doppler S, Beck N, Holdenrieder S, et al. Aggrecan: A new biomarker for acute thoracic aortic dissection. *Thoracic and Cardiovascular Surgeon Conference: 50th Annual Meeting of the German Society for Thoracic and Cardiovascular Surgery, DGTHG*. 2021;69(SUPPL 1).
9. Li T, Jiang B, Li X, Sun H-Y, Li X-T, Jing J-J, et al. Serum matrix metalloproteinase-9 is a valuable biomarker for identification of abdominal and thoracic aortic aneurysm: a case-control study. *BMC cardiovascular disorders*. 2018;18(1):202.
10. Liu X, Zheng X, Su X, Tian W, Hu Y, Zhang Z. Plasma Resistin Levels in Patients with Acute Aortic Dissection: A Propensity Score-Matched Observational Case-Control Study. *Medical science monitor : international medical journal of experimental and clinical research*. 2018;24:6431-7.

11. Ohle R, Um J, Anjum O, Bleeker H, Luo L, Wells G, et al. High Risk Clinical Features for Acute Aortic Dissection: A Case-Control Study. *Academic Emergency Medicine*. 2018;25(4):378-87.
12. Ohlmann P, Faure A, Morel O, Petit H, Kabbaj H, Meyer N, et al. Diagnostic and prognostic value of circulating D-Dimers in patients with acute aortic dissection. *Critical care medicine*. 2006;34(5):1358-64.
13. Okazaki T, Yamamoto Y, Yoda K, Nagahiro S. The ratio of D-dimer to brain natriuretic peptide may help to differentiate between cerebral infarction with and without acute aortic dissection. *Journal of the neurological sciences*. 2014;340(1-2):133-8.
14. Pan X, Zhou Y, Yang G, He Z, Zhang H, Peng Z, et al. Lysophosphatidic Acid May Be a Novel Biomarker for Early Acute Aortic Dissection. *Frontiers in surgery*. 2021;8:789992.
15. Sbarouni E, Georgiadou P, Marathias A, Geroulanos S, Kremastinos DT. D-dimer and BNP levels in acute aortic dissection. *International journal of cardiology*. 2007;122(2):170-2.
16. Sbarouni E, Georgiadou P, Kosmas E, Analitis A, Voudris V. Platelet to lymphocyte ratio in acute aortic dissection. *Journal of clinical laboratory analysis*. 2018;32(7):e22447.
17. Sbarouni E, Georgiadou P, Analitis A, Voudris V. High neutrophil to lymphocyte ratio in type A acute aortic dissection facilitates diagnosis and predicts worse outcome. *Expert review of molecular diagnostics*. 2015;15(7):965-70.
18. Shinohara T, Suzuki K, Okada M, Shiigai M, Shimizu M, Maehara T, et al. Soluble elastin fragments in serum are elevated in acute aortic dissection. *Arteriosclerosis, Thrombosis, and Vascular Biology*. 2003;23(10):1839-44.
19. Xiao Z, Xue Y, Yao C, Gu G, Zhang Y, Zhang J, et al. Acute Aortic Dissection Biomarkers Identified Using Isobaric Tags for Relative and Absolute Quantitation. *BioMed research international*. 2016;2016:6421451.
20. Xu Z, Wang Q, Pan J, Sheng X, Hou D, Chong H, et al. Characterization of serum miRNAs as molecular biomarkers for acute Stanford type A aortic dissection diagnosis. *Scientific reports*. 2017;7(1):13659.
21. Yuan S-M, Shi Y-H, Wang J-J, Lu F-Q, Gao S. Elevated plasma D-dimer and hypersensitive C-reactive protein levels may indicate aortic disorders. *Revista brasileira de cirurgia cardiovascular : orgao oficial da Sociedade Brasileira de Cirurgia Cardiovascular*. 2011;26(4):573-81.

22. Zeng Q, Rong Y, Li D, Wu Z, He Y, Zhang H, et al. Identification of Serum Biomarker in Acute Aortic Dissection by Global and Targeted Metabolomics. *Annals of vascular surgery*. 2020;68:497-504.
23. Cakir A, Payza U, Aksun S, Kayali A, Karakaya Z, Topal FE. Validity of signal peptide-cub-egf domain-containing protein-1 (Scube-1) in the diagnosis of aortic dissection. *Signa Vitae*. 2021;17(1):112-6.
24. Jiang Y, Tang X, Wang Y, Chen W, Xue Y, Cao H, et al. Serum Oxylipin Profiles Identify Potential Biomarkers in Patients with Acute Aortic Dissection. *Metabolites*. 2022;12(7) (no pagination).
25. Li T, Zhou Y, Li D, Zeng Z, Zhang S. The role of genome-scale leukocyte long noncoding RNA in identifying acute aortic dissection. *Signa Vitae*. 2022;18(3):101-10.
26. Song R, Xu N, Luo L, Zhang T, Duan H. Diagnostic Value of Aortic Dissection Risk Score, Coagulation Function, and Laboratory Indexes in Acute Aortic Dissection. *BioMed Research International*. 2022;2022:7447230.
27. Ziyu Z, Zi Y, Jialin Y, Weiping W, Hong Z. Value of D-dimer for detection of acute aortic dissection. *Heart*. 2012;2):E268.
28. Xu Z, Wei M, Guo X, Zhang Q, Ma Y, Gao Z, et al. Changes of Serum D-Dimer, NT-proBNP, and Troponin I Levels in Patients with Acute Aortic Dissection and the Clinical Significance. *Evidence-Based Complementary & Alternative Medicine: eCAM*. 2022;2022:8309505.
29. Zhao G, Zhao Y, Zhang H. Value of duration of chest pain, troponin, and D-dimer in differentiating acute high-risk chest pain patient. *Acta Medica Mediterranea*. 2020;36(3):1587-91.
30. Lu P, Feng X, Li R, Deng P, Li S, Xiao J, et al. A Novel Serum Biomarker Model to Discriminate Aortic Dissection from Coronary Artery Disease. *Disease Markers*. 2022;2022:9716424.
31. Goliopoulou A, Oikonomou E, Antonopoulos A, Koumallos N, Gazouli M, Theofilis P, et al. Expression of Tissue microRNAs in Ascending Aortic Aneurysms and Dissections. *Angiology*. 2022;33197221098295.
32. Suzuki T, Katoh H, Watanabe M, Kurabayashi M, Hiramori K, Hori S, et al. Novel biochemical diagnostic method for aortic dissection: results of a prospective study using an immunoassay of smooth muscle myosin heavy chain. *Circulation*. 1996;93(6):1244-9.
33. Hazui H, Fukumoto H, Negoro N, Hoshiga M, Muraoka H, Nishimoto M, et al. Simple and useful tests for discriminating between acute aortic dissection of the ascending

aorta and acute myocardial infarction in the emergency setting. *Circulation journal : official journal of the Japanese Circulation Society*. 2005;69(6):677-82.

34. Hagiwara A, Sakamoto D, Sasaki R, Kobayashi K, Sato T, Kimira A. Diagnosis of acute aortic dissection using a fibrinolytic marker. *Critical Care Medicine*. 2010;12):A178.

35. Suzuki T, Trimarchi S, Sawaki D, Grassi V, Costa E, Rampoldi V, et al. Circulating transforming growth factor-beta levels in acute aortic dissection. *J Am Coll Cardiol*. 2011;58(7):775.

36. Wagner A, Domanovits H, Holzer M, Kofler J, Röggl M, Müllner M, et al. Plasma endothelin in patients with acute aortic disease. *Resuscitation*. 2002;53(1):71-6.

37. Fletcher A, Syed MBJ, Iskander Z, Debono S, Dweck MR, Huang J, et al. Plasma desmosine as a biomarker in acute aortic syndrome. *European Heart Journal*. 2021;42(1).

38. Zhang D, Zhao X, Wang B, Liu X, Aizezi A, Ma X. Circulating exosomal miRNAs as novel biomarkers for acute aortic dissection. *Medicine*. 2023;102(30):e34474.
